# Supplementary material
Source: publisher figshare collection journal article supplement (https://acs.figshare.com/ndownloader/files/19139912)
Supplement: Supplementary file 1 [file 19139912]

Supplementary Information:

**I. Material characterization**

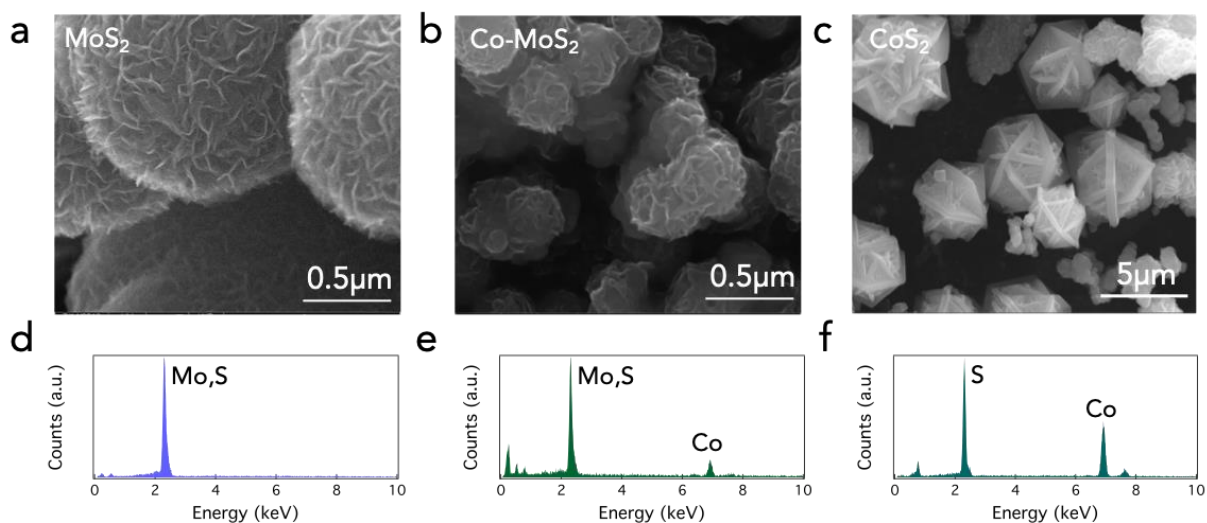

Figure S1. SEM images and corresponding EDAX of (a)(d)  $\text{MoS}_{2-x}$  (b)(e) Co-doped  $\text{MoS}_{2-x}$  and (c)(f)  $\text{CoS}_2$ .

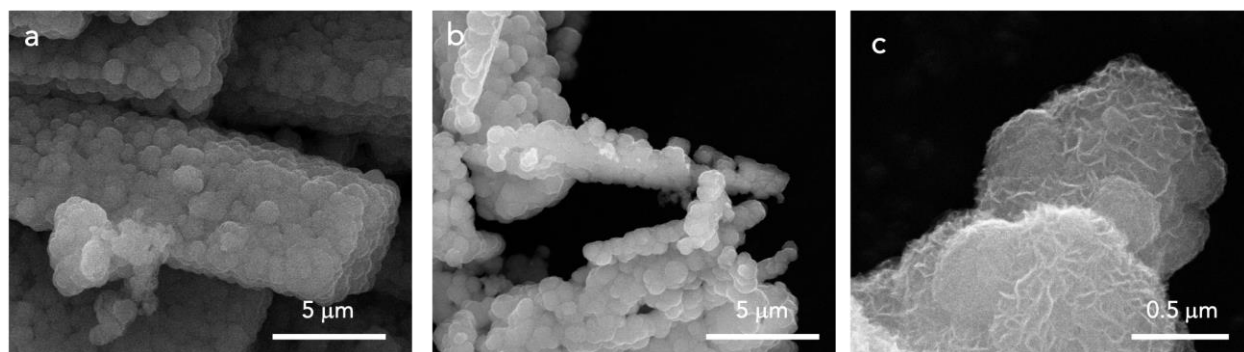

Figure S2. SEM image of hydrothermal samples synthesized from precursor recipe of 1:9 Co/Mo molar ratio. Spheres made of  $\text{MoS}_{2-x}$  nanosheets assemble into bars (a) and plates (b), entirely different from the morphology shown in Figure S1b. The shapes of the spheres are turning into hexagons, resembling the morphology of  $\text{CoS}_2$  shown in Figure S1c. (b) Magnified morphology of  $\text{MoS}_{2-x}$  spheres in (a), showing  $\text{MoS}_{2-x}$  covering those spheres. The morphology evolution at 1:9 Co/Mo molar ratio implies a possible  $\text{Co}_x\text{S}_y$ /Co-doped  $\text{MoS}_{2-x}$  phase separation process.

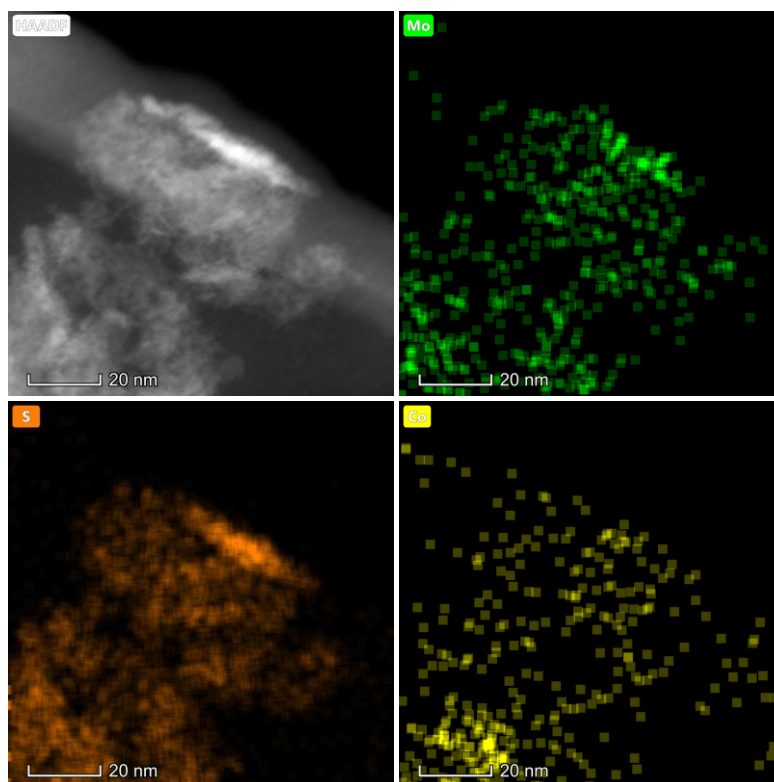

Figure S3. Additional EDAX mapping on Co-doped  $\text{MoS}_{2-x}$ .

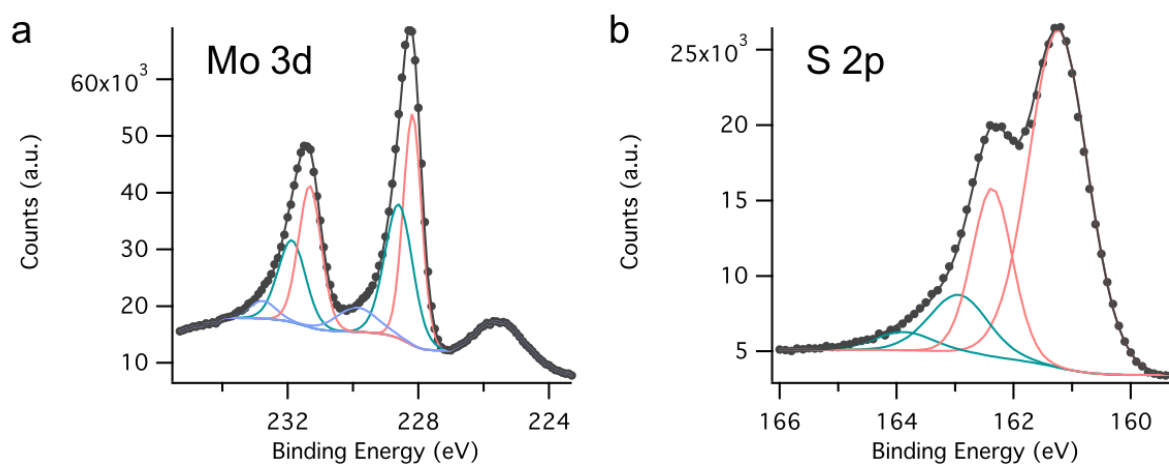

Figure S4. XPS spectra of un-doped  $\text{MoS}_{2-x}$  grown by hydrothermal method.

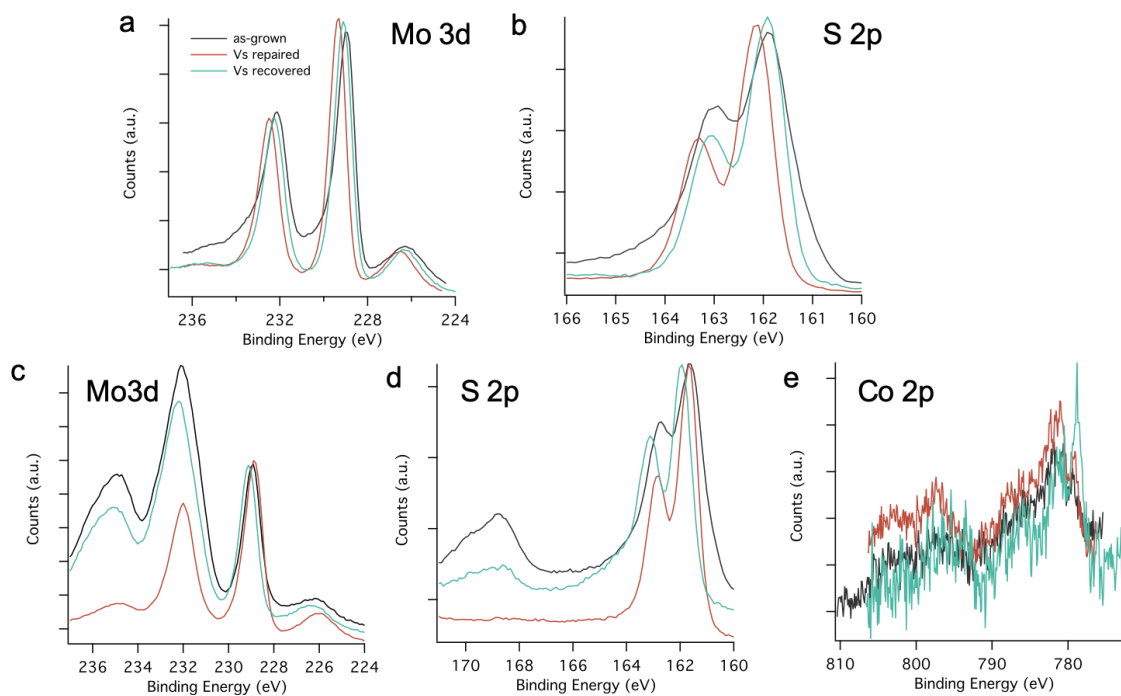

Figure S5. XPS of  $V_S$ -repaired and  $V_S$ -recovered  $\text{MoS}_{2-x}$  and  $\text{Co-MoS}_{2-x}$ .

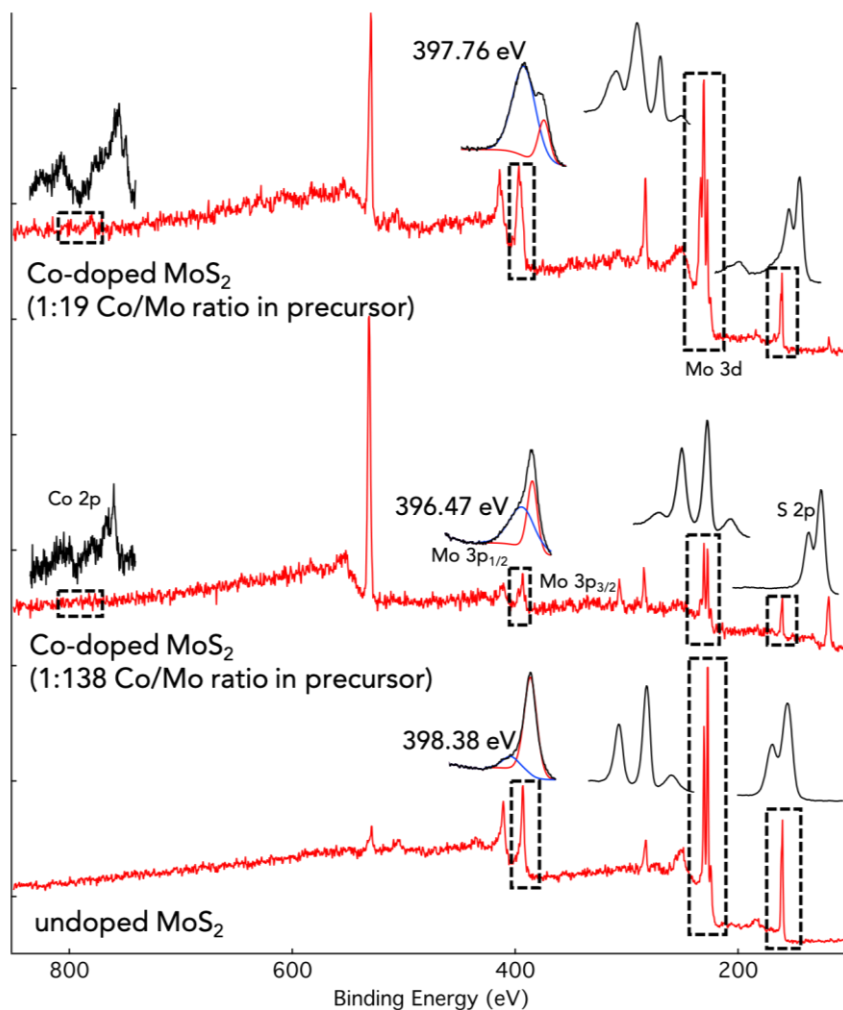

Figure S6. XPS of undoped and Co-doped  $\text{MoS}_{2-x}$  samples.

Table S1. Calculated S/Mo ratio from XPS.

|                                | un-doped | Co-doped |
|--------------------------------|----------|----------|
| as-grown                       | 1.85     | 1.39     |
| S annealed                     | 1.92     | 1.54     |
| $\text{N}_2\text{H}_4$ treated | 1.88     | 1.45     |

Table S2. Calculated Co doping concentration from XPS.

|                                | Co/(Co+Mo) |
|--------------------------------|------------|
| as-grown                       | 6.38%      |
| S annealed                     | 6.47%      |
| $\text{N}_2\text{H}_4$ treated | 5.49%      |

### XPS analysis:

The XPS signal of undoped  $\text{MoS}_{2-x}$  synthesized by hydrothermal method is presented in Figure S4. The peaks of Mo 3d core level is deconvoluted into three sets of signals. Two of them (red and green) are prominent, assigned to Mo in original (without S vacancy) and defected  $\text{MoS}_{2-x}$  structures (with S vacancy), respectively. Accordingly, the peaks S 2p core level is deconvoluted into two corresponding sets of signals. The blue curve implies some other Mo state accompanied with multiple S vacancies.

The XPS signal of Co-doped  $\text{MoS}_{2-x}$  synthesized by hydrothermal method is presented in Figure 2c. The peaks of Mo 3d core level is deconvoluted into four sets of signals. Two of them (yellow and green) are similar to the peaks in undoped  $\text{MoS}_{2-x}$ . The other two (blue and red) are assigned to Mo next to Co dopant without and with S vacancy, respectively. Notably, the signal of Mo not accompanied with Co dopant, but with S vacancy (green in Figure S4a and Figure 2c) is significantly suppressed after Co doping, implying the tendency of S vacancy to simultaneously form close to Co dopant. Accordingly, the peaks of S 2p core level is perfectly deconvoluted into three sets of signals, without one assigned to the S vacancy far from a Co dopant.

Figure S5 displays the effect of S vacancy repair and recovery on the XPS core levels. In both undoped and Co-doped cases, Vs repair makes the ‘valley’ between the neighbor peaks of Mo and S core levels deeper (black to red), indicating less convoluted of the overall signal and suppression of the S vacancy related signals. As discussed in the main text, hydrazine treatment recovers S vacancy to limited extent, proved by the evolution from red to green curves, showing signs of reversion to the black curve, but not fully. The peaks related to Co doping (as mentioned in the discussion for Figure 2c) are significantly suppressed after Vs repair, and strengthened after Vs recovery, showing their strong correlation.

All our analysis of the XPS deconvolution matches the data in the reference,<sup>1</sup> i.e. Mo 3d5/2: 228 ~ 233 eV, S 2p3/2: 160 ~ 178 eV.

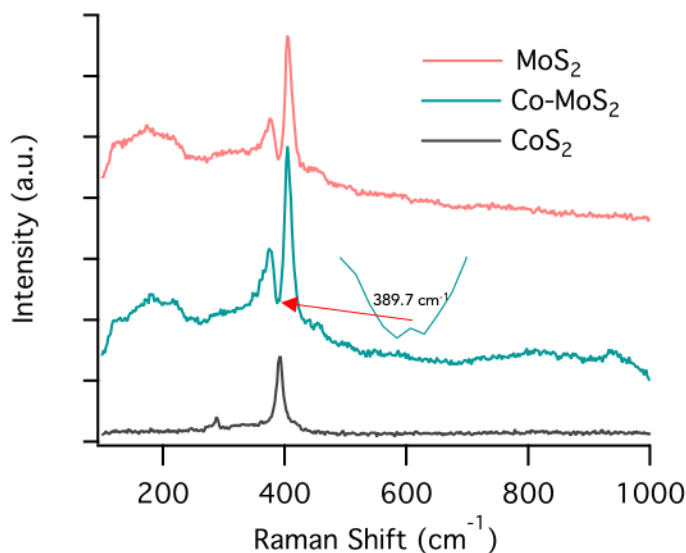

Figure S7. Raman spectra of  $\text{MoS}_{2-x}$ , Co-doped  $\text{MoS}_{2-x}$  and  $\text{CoS}_2$ . The broad peaks around 200  $\text{cm}^{-1}$  are possibly defect related. The spectra are identical except for the tiny peak near 390  $\text{cm}^{-1}$  for Co- $\text{MoS}_{2-x}$ .

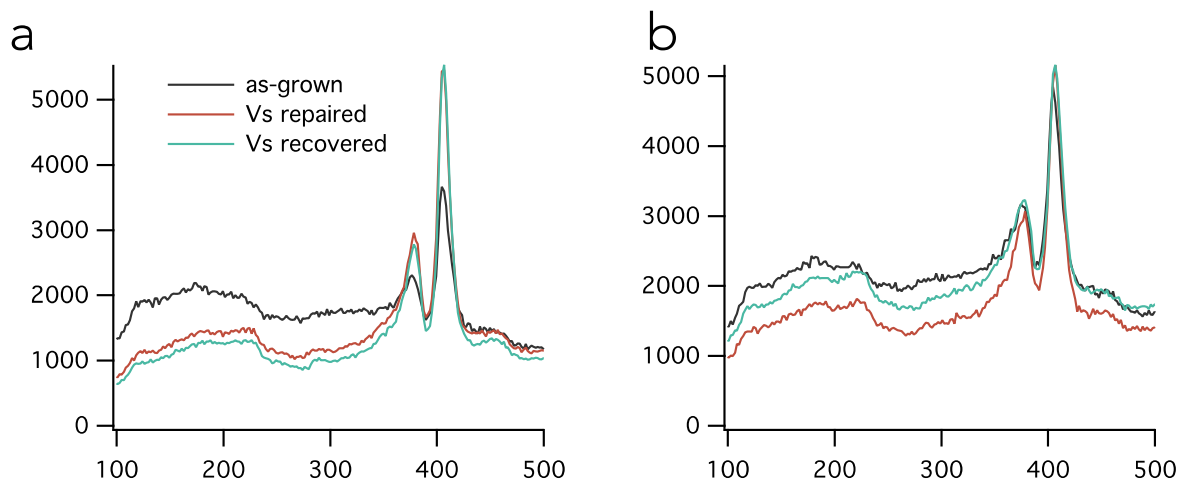

Figure S8. Raman of  $V_S$ -repaired and  $V_S$ -recovered  $\text{MoS}_{2-x}$  (a) and  $\text{Co-MoS}_{2-x}$  (b).

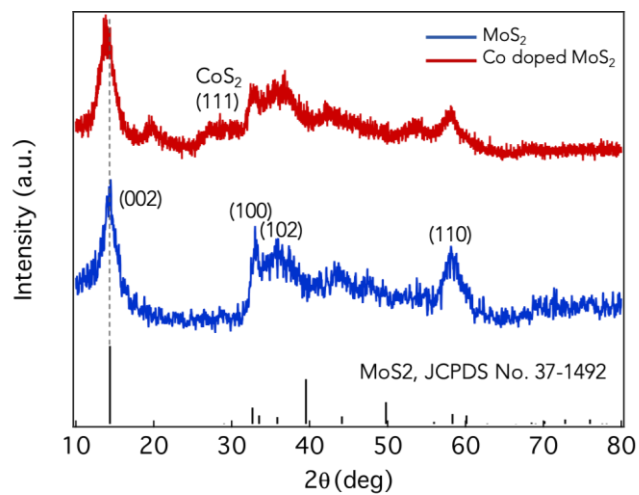

Figure S9. X-ray diffraction pattern of undoped and Co-doped  $\text{MoS}_{2-x}$ .

## II. DFT calculation



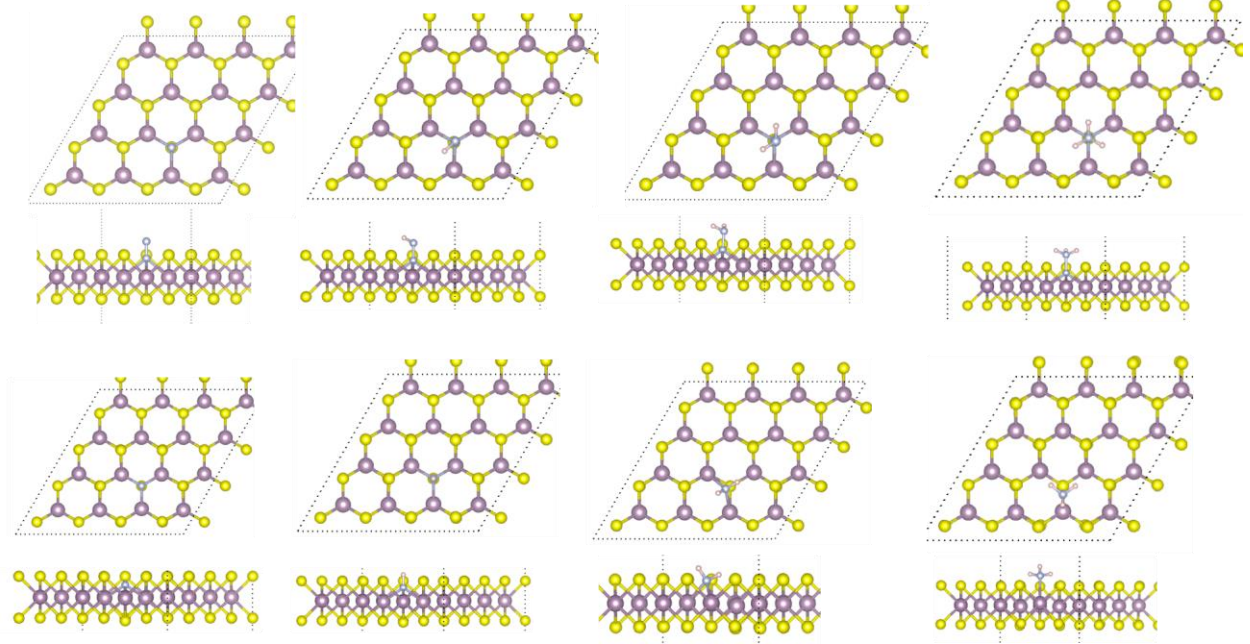

Figure S10. Top-view and side-view of relaxed structures of MoS<sub>2</sub> with single V<sub>s</sub> in a 4×4 unit cell for each step of the ammonia production. Purple yellow, grey and pink spheres represent molybdenum, sulfur, nitrogen and hydrogen, respectively.

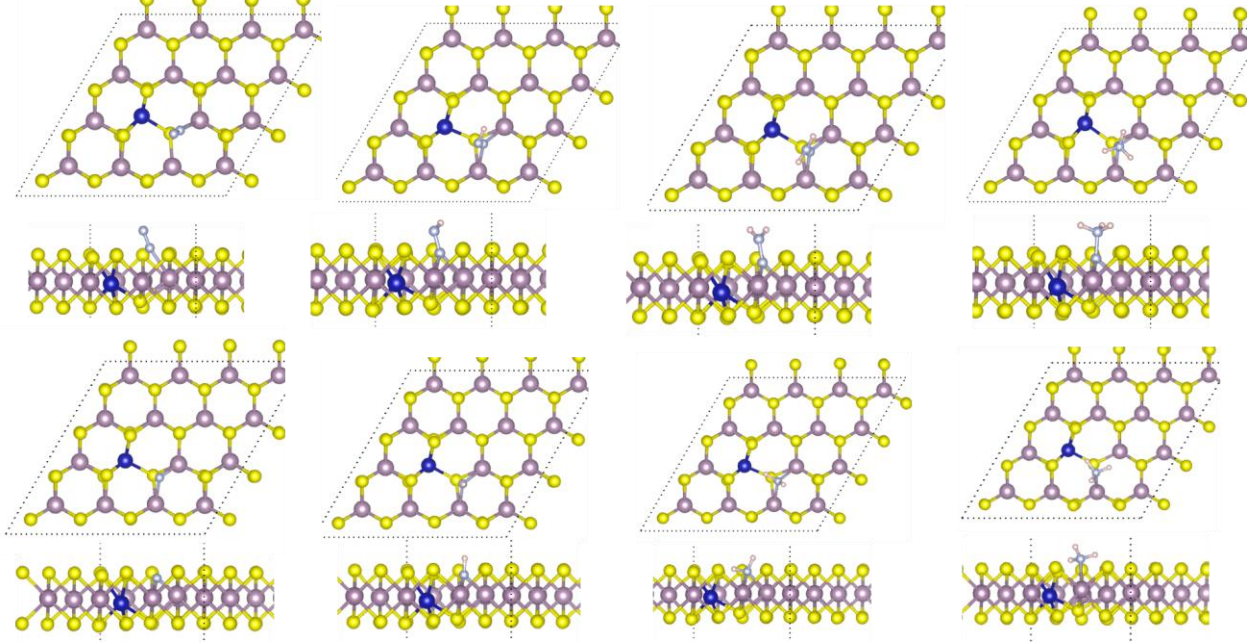

Figure S11. Top-view and side-view of relaxed structures of Co-doped MoS<sub>2</sub> with single V<sub>s</sub> in a 4×4 unit cell for each step of the ammonia production. Blue spheres represent cobalt.

### III. NRR characterization

*NRR parameters calculation:*

Assuming the amount of ammonia N determined by chromogenic method is  $n_N$ , total amount of charge during the reaction determined by integration of i-t curve is  $Q$ , the reaction time is  $t$ , the

weight of catalyst loaded on the carbon cloth is  $m_{cata}$ , the charge of an electron is  $e$ , Avogadro's constant is  $N$ , the production rate and Faradaic efficiency is calculated as follows:

$$r_{production} = \frac{n_N}{m_{cata} * t}$$

$$\eta_{Faradic} = \frac{3 * e * N * n_N}{Q}$$

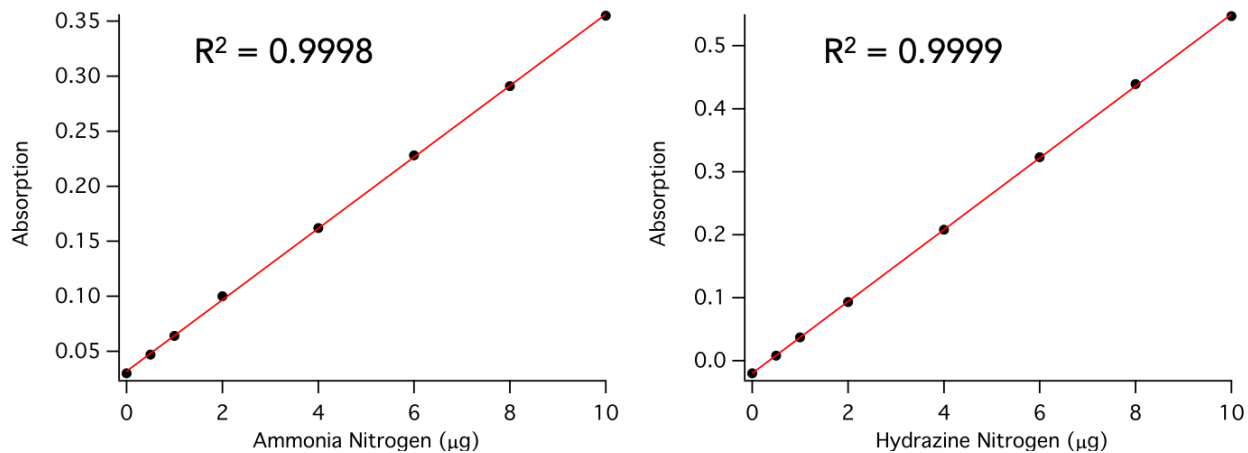

Figure S12. Calibration curves of ammonia nitrogen and hydrazine nitrogen.

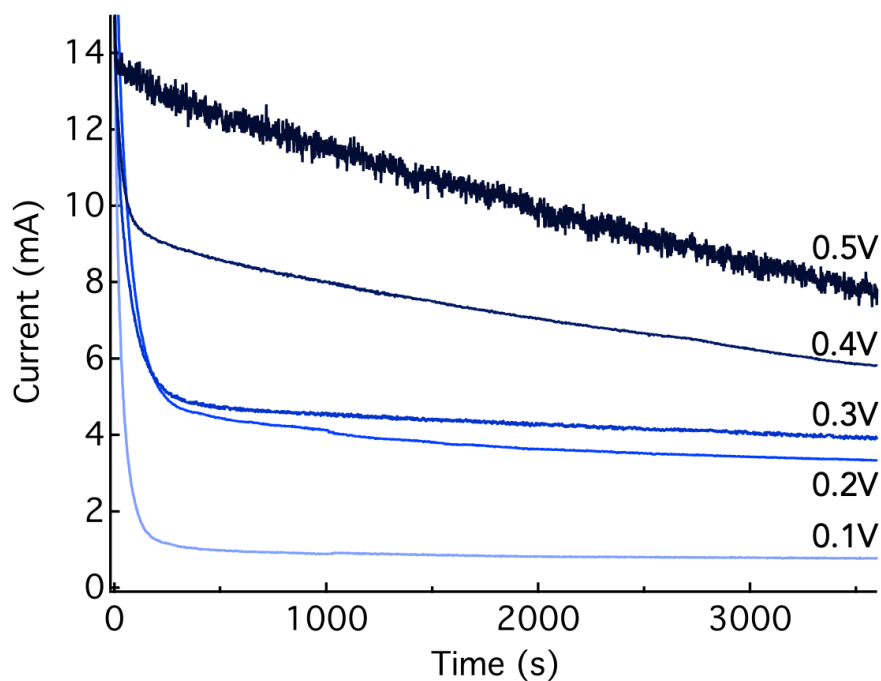

Figure S13. I-t curve of NRR tests at elevated overpotentials.



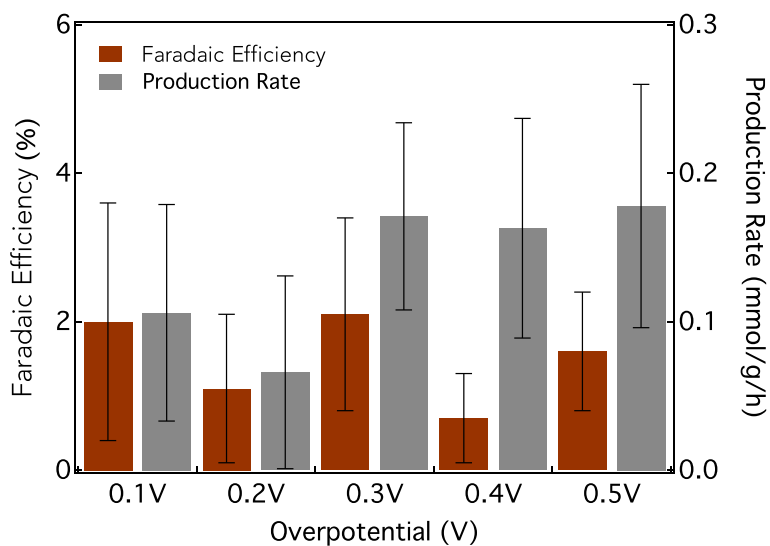

Figure S14. Dependence of hydrazine production on overpotentials.

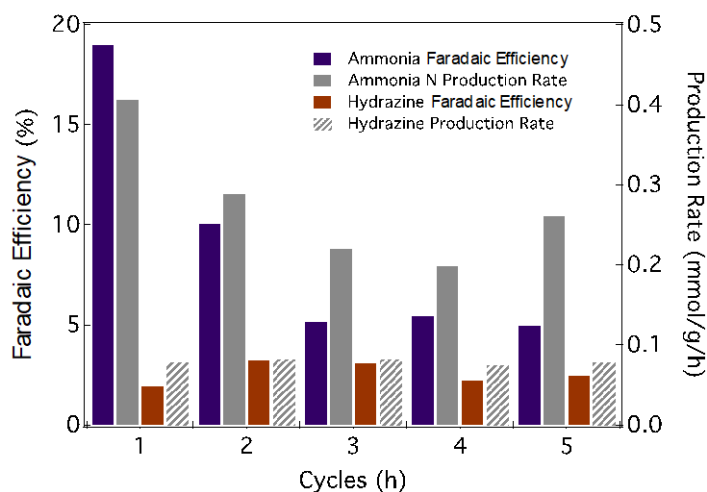

Figure S15. Cyclic tests for ammonia nitrogen and hydrazine at 0.3 V overpotential. Both Faradaic efficiency and production rate drops in the first two cycles and reaches a steady state in the following cycles. Considering it is reduction bias applied during the reaction and  $\text{MoS}_2$  is electrochemically stable in the bias range, we attribute the degrade of the overall performance to the following reason: as a layered material, Co-doped  $\text{MoS}_{2-x}$  suffers from delamination with hydrogen evolution accompanied with NRR. Decreased amount of loaded  $\text{MoS}_{2-x}$  will certainly lead to degraded production rate. Faradaic efficiency, which should remain constant for the material, degrades as well because delamination of  $\text{MoS}_{2-x}$  will expose carbon cloth, and the latter is known to moderately catalyze hydrogen evolution but poorly do NRR reaction.<sup>2, 3</sup>

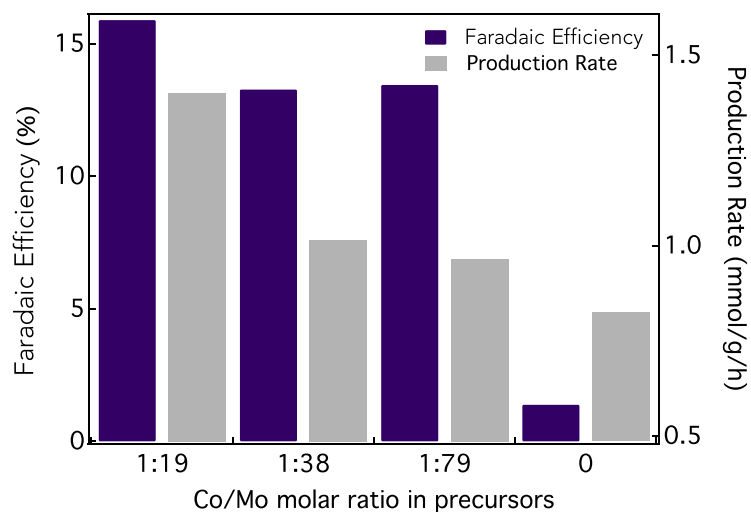

Figure S16. Dependence of Faradaic efficiency and production rate on the Co/Mo molar ratio in hydrothermal precursors.

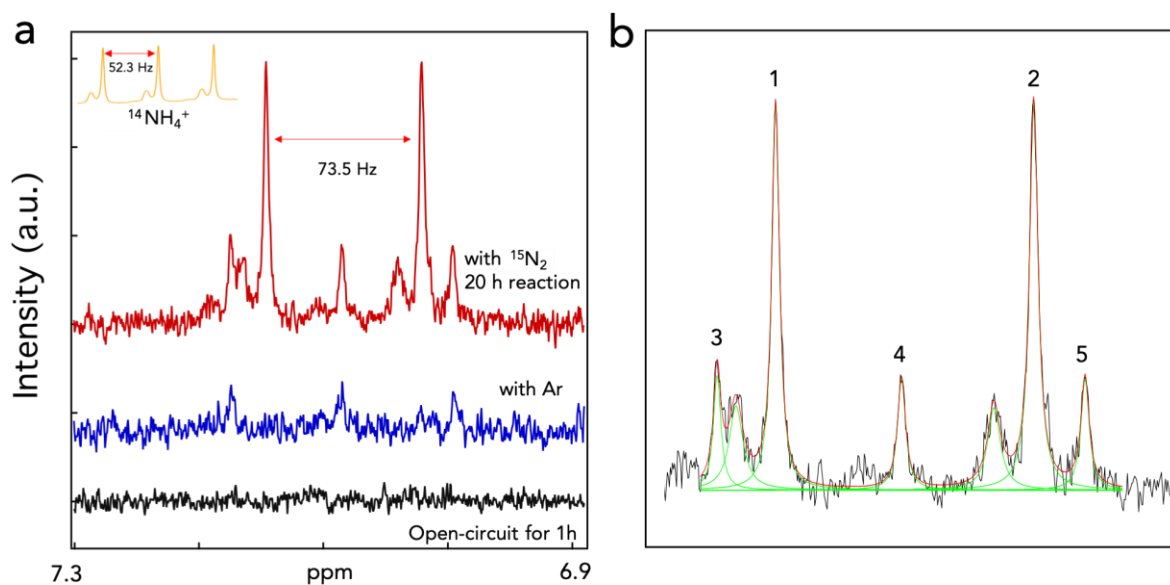

Figure S17. (a) NMR spectra of samples derived from  $^{15}\text{N}$  labeled  $\text{N}_2$  (red curve). The inset (yellow) curve shows the NMR pattern for  $^{14}\text{N NH}_4^+$ . (b) Deconvoluted peaks of red curve in (a). Peak 1, 2 and 3, 4, 5 correspond to  $^{15}\text{N}$  and  $^{14}\text{N}$  ammonia detected from the NMR test, respectively. The  $^{15}\text{N}$  ammonia percentage in the overall product calculated from the integral areas of proton NMR peaks corresponding to  $^{15}\text{N}$  and  $^{14}\text{N}$  ammonia is 70%.

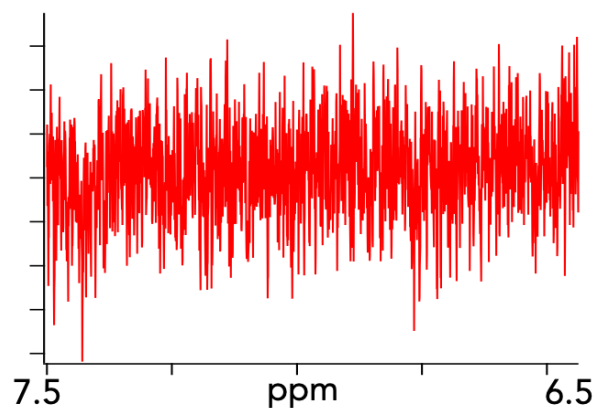

Figure S18. NMR spectra of solution with Co-doped MoS<sub>2-x</sub> after ultrasonication in H<sub>2</sub>SO<sub>4</sub> for 30 min.

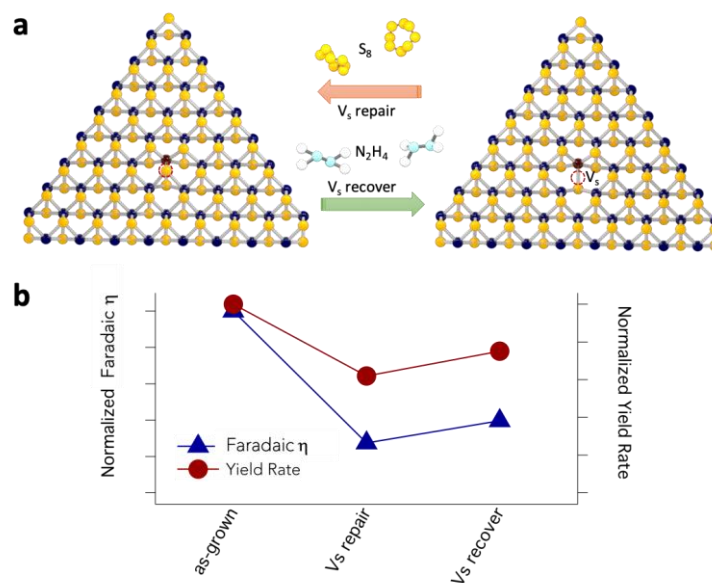

Figure S19. NRR performance modulated by defect repair and creation. (a) Schematic illustration of the S vacancy repair and recovery process *via* annealing in gaseous S atmosphere and treatment with hydrazine solution. (b) NRR performance evolution with S vacancy elimination and creation.

Table S3. Data for Figure S19b.

|                                       | Faradaic Efficiency (%) | Production Rate (mmol/g/h) |
|---------------------------------------|-------------------------|----------------------------|
| as-grown                              | 10.21                   | 0.822                      |
| S annealed                            | 2.8                     | 0.509                      |
| N <sub>2</sub> H <sub>4</sub> treated | 4.05                    | 0.617                      |

## References:

1. Briggs, D., *Handbook of X-Ray and Ultraviolet Photoelectron Spectroscopy*. Heyden London: 1977.
2. Wen, L.; Yu, J.; Xing, C.; Liu, D.; Lyu, X.; Cai, W.; Li, X., Flexible Vanadium-Doped Ni<sub>2</sub>P Nanosheet Arrays Grown on Carbon Cloth for an Efficient Hydrogen Evolution Reaction. *Nanoscale* **2019**, *11*, 4198-4203.
3. Li, W.; Wu, T.; Zhang, S.; Liu, Y.; Zhao, C.; Liu, G.; Wang, G.; Zhang, H.; Zhao, H., Nitrogen-Free Commercial Carbon Cloth with Rich Defects for Electrocatalytic Ammonia Synthesis under Ambient Conditions. *Chem. Commun.* **2018**, *54*, 11188-11191.
